# Supplementary material for: MicroRNA expression profile in serum reveals novel diagnostic biomarkers for endometrial cancer
Source: PubMed Central journal article supplement (PMC8209168; doi:10.1042/bsr20210111), 2021-06-16
Supplement: BSR-2021-0111_supp.pdf [file BSR-2021-0111_supp.pdf]

## Supplementary

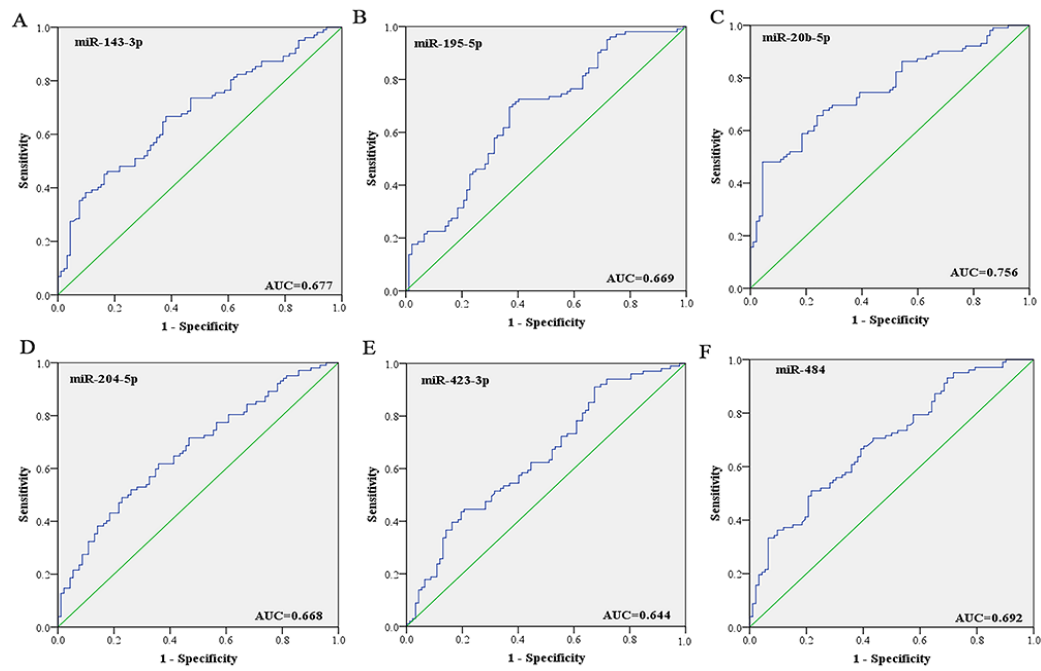

**Figure S1:** ROC curve analyses of each miRNA to discriminate EC patients from NCs in the combined three phases. A: miR-143-3p; B: miR-195-5p; C: miR-20b-5p; D: miR-204-5p; E: miR-423-3p; F: miR-484.

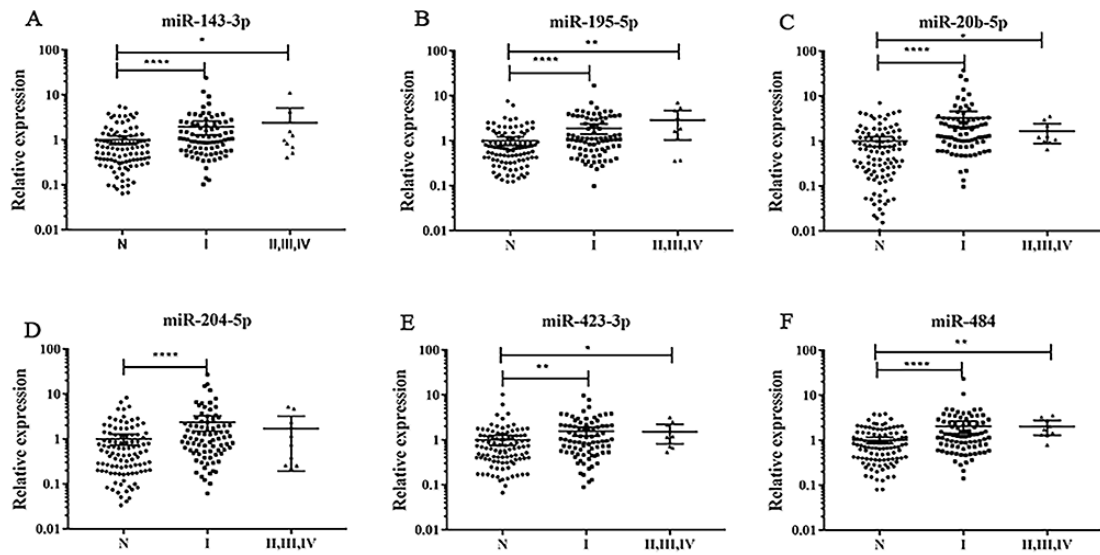

**Figure S2:** Association of the identified miRNAs with different clinicopathological parameters (FIGO stage). A: miR-143-3p; B: miR-195-5p; C: miR-20b-5p; D: miR-204-5p; E: miR-423-3p; F: miR-484. N: normal controls; \*:  $P < 0.05$ .

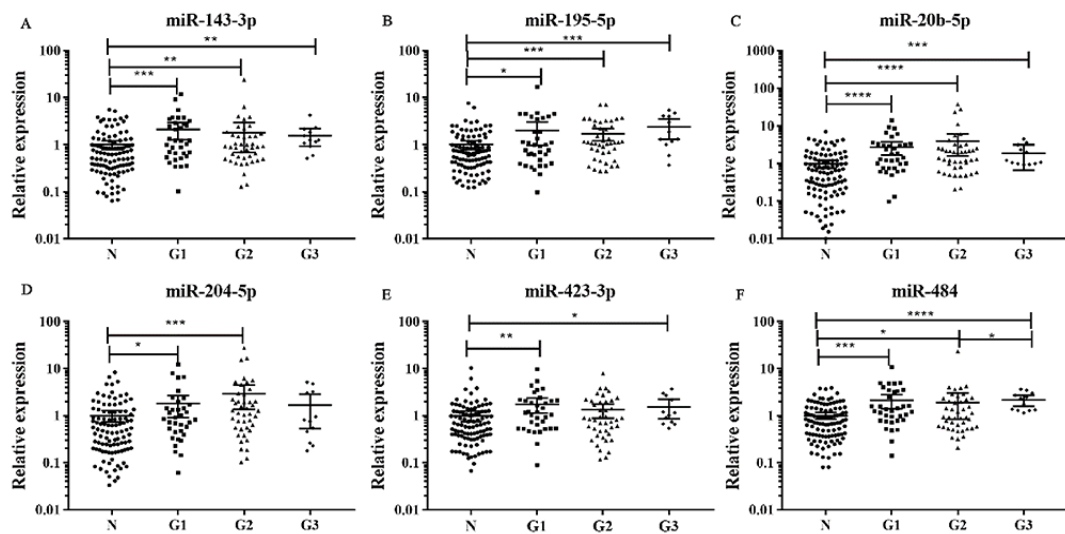

**Figure S3:** Association of the identified miRNAs with different clinicopathological parameters (histological grade). A: miR-143-3p; B: miR-195-5p; C: miR-20b-5p; D: miR-204-5p; E: miR-423-3p; F: miR-484. N: normal controls; \*:  $P < 0.05$ .

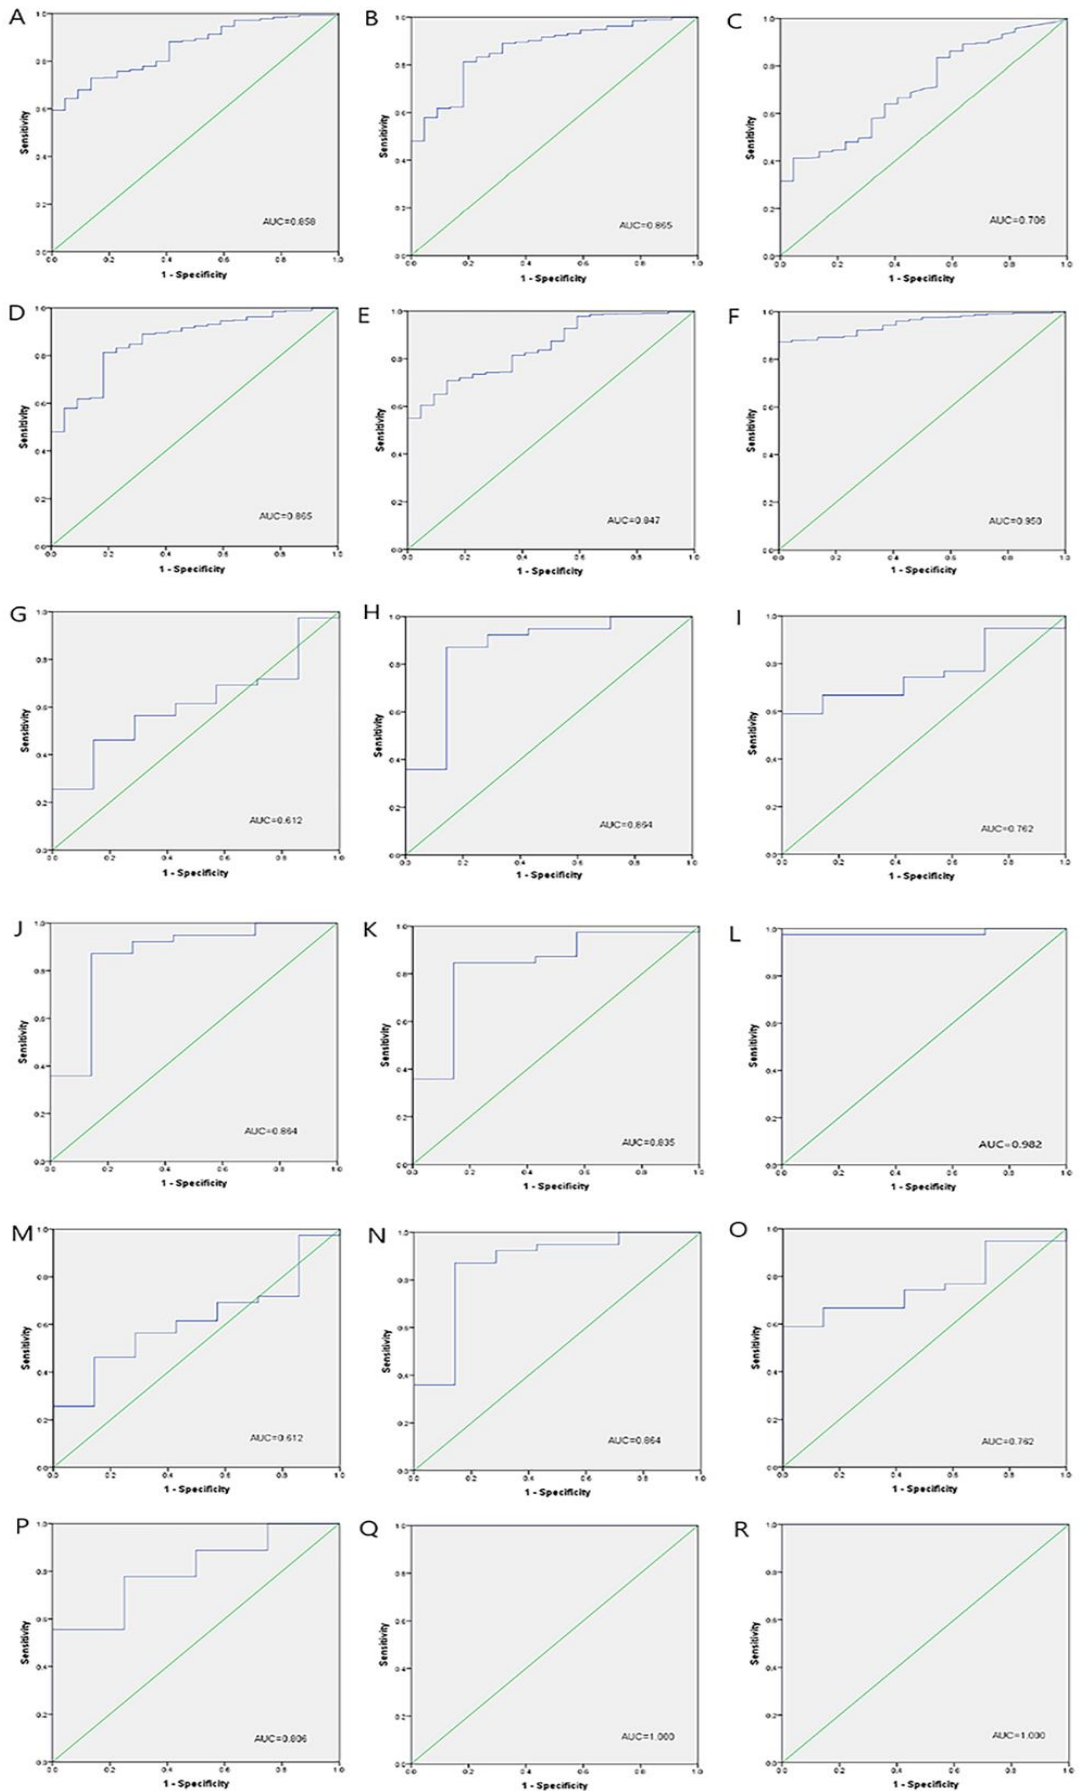

**Figure S4:** Endometrial cancer diagnostic capability of the signature and previously identified biomarkers (presented as the results of ROC curve analysis using the data from TCGA and GEO datasets).

**TCGA:**

(A) Andrea Ritter *et al.*: AUC = 0.858, 95% CI:0.801-0.914, P<0.05, Sensitivity = 72.9 %, Specificity = 86.4%.

(B) Wenhui Jia *et al.*: AUC = 0.865, 95% CI:0.801-0.930, P<0.05, Sensitivity = 81.3%, Specificity = 81.8%.

(C) Anna Torres *et al.*: AUC = 0.706, 95% CI:0.610-0.801, P<0.05, Sensitivity = 63.8%, Specificity = 63.6%.

(D) Martina Montagnana *et al.*: AUC = 0.865, 95% CI:0.801-0.930, P<0.05, Sensitivity = 81.3%, Specificity = 81.8%.

(E) Lin Wang *et al.*: AUC = 0.847, 95% CI:0.785-0.910, P<0.05, Sensitivity = 70.9%, Specificity = 86.4%.

(F) Ozora Tsukamoto *et al.*: AUC = 0.950, 95% CI:0.927-0.972, P<0.05, Sensitivity = 87.2%, Specificity = 100%.

**GSE25405:**

(G) Andrea Ritter *et al.*: AUC = 0.612, 95% CI:0.420-0.803, P<0.05, Sensitivity = 56.4 %, Specificity = 71.4%.

(H) Wenhui Jia *et al.*: AUC = 0.864, 95% CI:0.698-1.000, P<0.05, Sensitivity = 87.2%, Specificity = 85.7%.

(I) Anna Torres *et al.*: AUC = 0.762, 95% CI:0.617-0.906, P<0.05, Sensitivity = 66.7%, Specificity = 85.7%.

(J) Martina Montagnana *et al.*: AUC = 0.864, 95% CI:0.698-0.1.000, P<0.05, Sensitivity = 87.2%, Specificity = 85.7%.

(K) Lin Wang *et al.*: AUC = 0.835, 95% CI:0.0.669-1.000, P<0.05, Sensitivity = 84.6%, Specificity = 85.7%.

(L) Ozora Tsukamoto *et al.*: AUC = 0.982, 95% CI:0.944-1.000, P<0.05,  
Sensitivity = 97.4%, Specificity = 100%.

**GSE35794:**

(M) Andrea Ritter *et al.*: AUC = 0.847, 95% CI:0.652-1.000, P<0.05,  
Sensitivity = 77.8 %, Specificity = 75%.

(N) Wenhui Jia *et al.*: AUC = 0.806, 95% CI:0.597-1.000, P<0.05, Sensitivity  
= 77.8%, Specificity = 75%.

(O) Anna Torres *et al.*: AUC = 0.889, 95% CI:0.736-1.000, P<0.05, Sensitivity  
= 77.8%, Specificity = 75%.

(P) Martina Montagnana *et al.*: AUC = 0.806, 95% CI:0.597-1.000, P<0.05,  
Sensitivity = 77.8%, Specificity = 75%.

(Q) Lin Wang *et al.*: AUC = 1.000, 95% CI:1.000-1.000, P<0.05, Sensitivity =  
100%, Specificity = 100%.

(R) Ozora Tsukamoto *et al.*: AUC = 1.000, 95% CI:1.000-1.000, P<0.05,  
Sensitivity = 100%, Specificity = 100%.

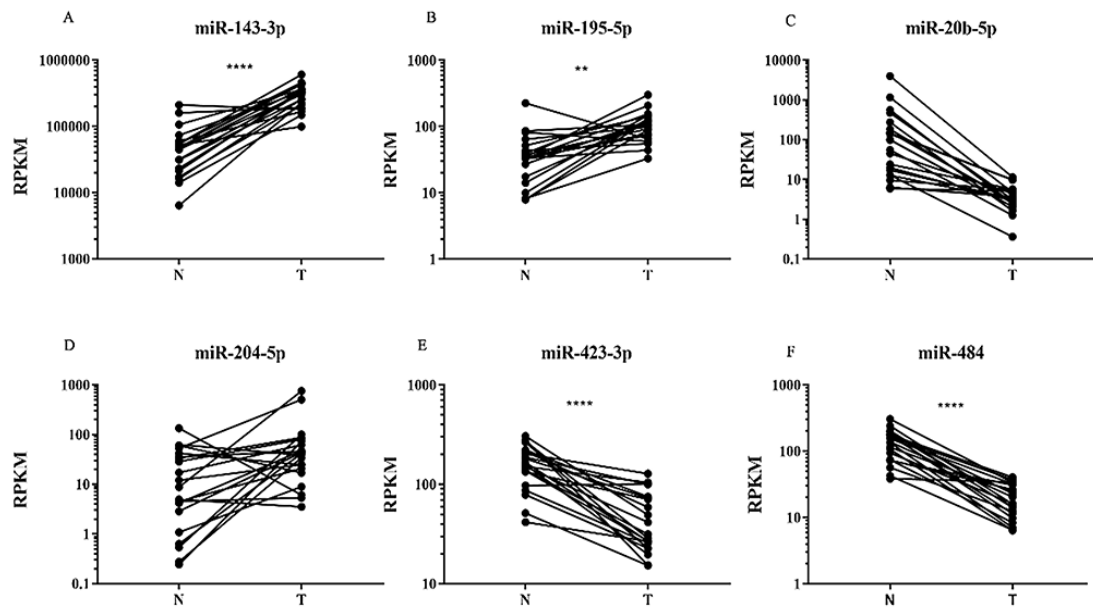

**Figure S5:** Expression levels of the six miRNAs the tumor tissues of 21 pairs of EC patients in TCGA data. A: miR-143-3p; B: miR-195-5p; C: miR-20b-5p; D: miR-204-5p; E: miR-423-3p; F: miR-484. N: normal controls; \*:  $P < 0.05$ .





**Table S1:** Inclusion and exclusion criteria of cases and controls.

|                               | <b>Cases</b>                                                                        | <b>Controls</b>                                                                     |
|-------------------------------|-------------------------------------------------------------------------------------|-------------------------------------------------------------------------------------|
| <b>Inclusion<br/>criteria</b> | (1) Women                                                                           | (1) Women                                                                           |
|                               | (2) Age 18-75                                                                       | (2) Age 18-75                                                                       |
|                               | (3) Pathologically diagnosed as endometrial cancer                                  | (3) Clinical confirmation of endometrial cancer-free                                |
|                               | (4) No treatment                                                                    | (4) Written informed consent                                                        |
|                               | (5) Written informed consent                                                        |                                                                                     |
| <b>Exclusion<br/>criteria</b> | (1) History of previous or concomitant malignancies                                 | (1) History of previous or concomitant malignancies                                 |
|                               | (2) Other severe systematic diseases that considered to be unsuitable for the study | (2) Other severe systematic diseases that considered to be unsuitable for the study |
|                               | (3) History of antitumor therapy                                                    | (3) Pregnant or lactating women                                                     |
|                               | (4) Pregnant or lactating women                                                     | (4) Without informed consent                                                        |
|                               | (5) Without informed consent                                                        |                                                                                     |

**Table S2:** Differently expressed miRNAs in the screening phase

| miRNA           | FC (Exiqon panels) |        |           |
|-----------------|--------------------|--------|-----------|
|                 | pool1              | pool2  | Mean fold |
| hsa-miR-484     | 1.90               | 2.02   | 1.96      |
| hsa-miR-605     | 4.92               | 8.68   | 6.80      |
| hsa-miR-106b-3p | 2.15               | 2.53   | 2.34      |
| hsa-miR-10a-5p  | 3.47               | 3.32   | 3.39      |
| hsa-miR-10b-5p  | 6.41               | 2.40   | 4.40      |
| hsa-miR-125b-5p | -2.97              | -7.60  | -5.29     |
| hsa-miR-142-3p  | 1.78               | 1.94   | 1.86      |
| hsa-miR-143-3p  | -9.96              | -10.26 | -10.11    |
| hsa-miR-144-5p  | 3.69               | 2.50   | 3.09      |
| hsa-miR-145-5p  | 3.68               | 2.79   | 3.24      |
| hsa-miR-151a-3p | 3.97               | 2.55   | 3.26      |
| hsa-miR-190a-5p | 5.74               | 2.65   | 4.20      |
| hsa-miR-195-5p  | 6.05               | 2.35   | 4.20      |
| hsa-miR-200a-3p | 2.24               | 4.87   | 3.56      |
| hsa-miR-204-5p  | 6.87               | 5.55   | 6.21      |
| hsa-miR-208a-5p | 6.05               | 8.68   | 7.36      |
| hsa-miR-20b-5p  | 5.03               | 4.84   | 4.93      |
| hsa-miR-222-3p  | 2.17               | 1.56   | 1.87      |
| hsa-miR-29c-3p  | -4.20              | -9.00  | -6.60     |
| hsa-miR-320b    | 3.11               | 2.20   | 2.66      |
| hsa-miR-335-5p  | 1.72               | 1.99   | 1.85      |
| hsa-miR-361-3p  | 6.05               | 8.68   | 7.36      |
| hsa-miR-409-3p  | 2.31               | 1.90   | 2.10      |
| hsa-miR-423-3p  | 1.53               | 1.64   | 1.59      |
| hsa-miR-500a-5p | 2.24               | 1.80   | 2.02      |
| hsa-miR-590-5p  | 1.97               | 1.58   | 1.78      |
| hsa-miR-92a-3p  | 2.17               | 1.73   | 1.95      |
| hsa-miR-92b-3p  | 7.92               | 4.88   | 6.40      |
| hsa-let-7c      | -3.35              | -8.48  | -5.91     |

Abbreviation: FC, fold change.

**Table S3:** Expression levels of the identified miRNAs from screening phase but not passed through the training stage and the testing stage (presented as mean±SD; ΔCT).

| miRNA       | Training stage |            |      |         | Testing stage |            |     |         |
|-------------|----------------|------------|------|---------|---------------|------------|-----|---------|
|             | Cases          | Controls   | FC   | P value | Cases         | Controls   | FC  | P value |
| let-7c      | 7.5±1.02       | 7.5±0.98   | 1.00 | 0.653   |               |            |     |         |
| miR-106b-3p | 10.66±1.47     | 10.01±1.51 | 0.64 | 0.212   |               |            |     |         |
| miR-10a-5p  | 6.44±1.23      | 5.9±1.68   | 0.69 | 0.385   |               |            |     |         |
| miR-10b-5p  | 9.88±1.46      | 7.9±0.79   | 0.25 | 0.597   |               |            |     |         |
| miR-125b-5p | 7.35±0.96      | 7.54±1.03  | 1.14 | 0.019   | 5.93±3.45     | 6.31±2.36  | 1.3 | 0.769   |
| miR-142-3p  | 8.3±1.34       | 7.74±1.04  | 0.68 | 0.175   |               |            |     |         |
| miR-144-5p  | 13.87±1.44     | 14.32±0.78 | 1.36 | 0.247   |               |            |     |         |
| miR-145-5p  | 6.27±2.48      | 7.11±2.46  | 1.79 | 0.003   | 6.21±1.93     | 6.41±1.11  | 1.2 | 0.067   |
| miR-151a-3p | 7.99±1.6       | 8.49±1.22  | 1.42 | 0.011   | 7.46±2.64     | 8.22±1.45  | 1.7 | 0.059   |
| miR-190a-5p | 13.06±1.08     | 13.63±1.29 | 1.48 | 0.561   |               |            |     |         |
| miR-200a-5p | 11.52±0.99     | 11.54±1.24 | 1.01 | 0.673   |               |            |     |         |
| miR-208a-5p | 12.62±3.41     | 12.36±2.55 | 0.84 | 0.379   |               |            |     |         |
| miR-222-3p  | 6.01±1.03      | 6.16±0.68  | 1.11 | 0.286   |               |            |     |         |
| miR-29c-3p  | 9.63±1.18      | 10.11±1.26 | 1.39 | 0.021   | 10.81±1.95    | 11.52±1.21 | 1.6 | 0.213   |
| miR-320b    | 1.29±0.99      | 0.9±1.2    | 0.76 | 0.174   |               |            |     |         |
| miR-335-5p  | 13.55±1.57     | 13.05±1.2  | 0.71 | 0.716   |               |            |     |         |
| miR-361-3p  | 11.25±3.56     | 11.25±3.64 | 1.00 | 0.801   |               |            |     |         |
| miR-409-3p  | 9.5±0.92       | 9.08±0.76  | 0.75 | 0.673   |               |            |     |         |
| miR-500a-5p | 11.05±1.21     | 10.57±1.41 | 0.72 | 0.598   |               |            |     |         |
| miR-590-5p  | 11.41±1.4      | 11.96±1.24 | 1.47 | 0.013   | 10.83±2.95    | 12.02±1.82 | 2.3 | 0.052   |
| miR-605     | 11±1.61        | 10.95±1.54 | 0.97 | 0.587   |               |            |     |         |
| miR-92a-3p  | 2.62±1.1       | 3.12±0.9   | 1.41 | 0.019   | 1.89±2.38     | 3.2±1.14   | 2.5 | 0.061   |
| miR-92b-3p  | 8.25±1.2       | 8.71±0.78  | 1.38 | 0.006   | 7.9±2.18      | 8.44±1.3   | 1.5 | 0.078   |
